# Supplementary material for: Whole-brain radiation therapy plus simultaneous integrated boost for brain metastases from breast cancers
Source: PubMed Central journal article supplement (PMC11248998; doi:10.7717/peerj.17696), 2024-07-12

### Mean brain dose

—+ High      —+ Low

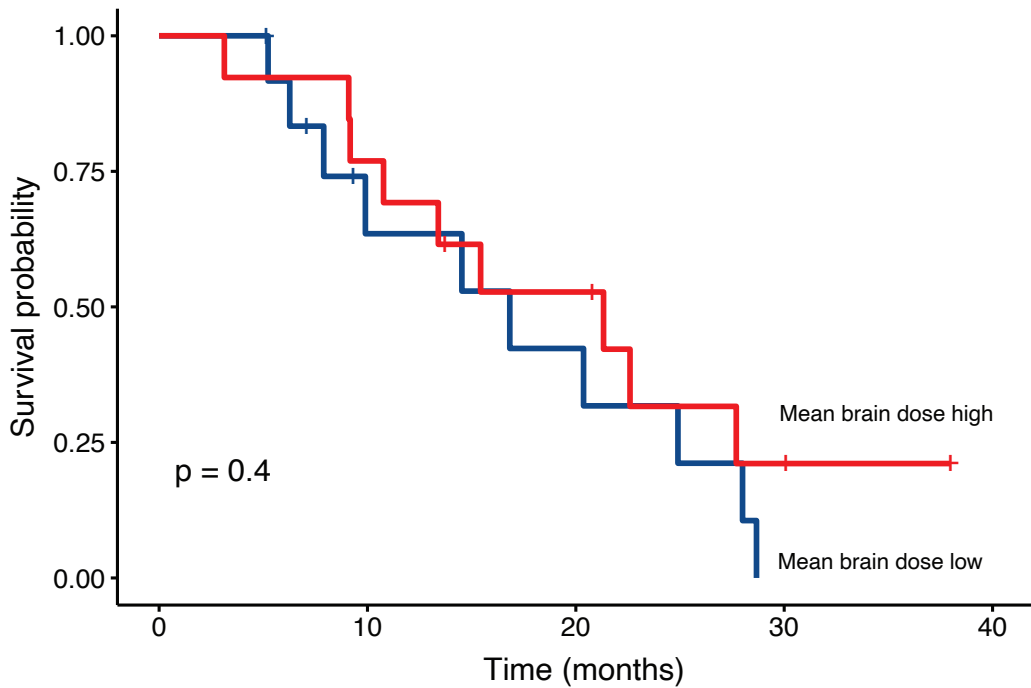

Supplement: peerj-12-17696-s002.pdf [file peerj-12-17696-s002.pdf]
