# Supplementary material for: Whole-brain radiation therapy plus simultaneous integrated boost for brain metastases from breast cancers
Source: PeerJ. 2024 Jul 12;12:e17696. doi: 10.7717/peerj.17696 (PMC11248998; doi:10.7717/peerj.17696)
Supplement: Supplemental Information 1 — The patient characteristic and treatment outcomes and univariate analysis of overall survival. [file peerj-12-17696-s001.xlsx]

## Sheet: Sheet1
ID	Age	Height	Weight	Diabetes	Hypertension	Coronary heart disease	COPD	Pathology	WHO grade	ER	PR	HER2	TNBC	Ki67	Bone metastasis	Lung metastasis	Liver metastasis	Others	Number of brain metastasis	RT technique	GTV EQD2	WBI EQD2	GTV BED	WBI BED	GTV	Dmax_GTV	Dmean_brain	PS_pre	PS_post	Response	TKI treatment	Brain progression	Brain PFS	Brain recurrence	Death status	Survival from BM	Cause of death	Neurological AE
1	63	157	47	Yes	No	No	No	Invasive ductal carcinoma	III	Negative	Negative	Negative	Yes	15	Yes	No	No	No	3	WBI+boost	52.08	40	62.5	48	3.2	5465.6	4347.9	90	80	CR		1	10.3667	Outside GTV	1	22.6	Extracranial PD	Yes
2	47	165	64	No	No	No	No	Invasive ductal carcinoma	II	Negative	Negative	Positive	No	50	No	Yes	Yes	No	2	WBI+boost	48.75	39.06	58.5	46.88	7.8	5032.1	4022.5	80	90	PR	yes	1	13.3333	Inside GTV	1	27.7	Extracranial PD	Yes
3	51	160	50	No	No	No	No	Invasive ductal carcinoma	III	Positive	Negative	Positive	No	50	No	Yes	No	No	2	WBI+boost	39.38	32.5	47.25	39	34.7	3660.9	3147.8	90	90	Not evaluated	yes	1	10.6667	Outside GTV	1	16.8333	Extracranial PD	Yes
4	42	163	53	No	No	No	No	Invasive ductal carcinoma	III	Negative	Negative	Positive	No	40	No	No	No	Yes	2	WBI+boost	40.8	32.5	48.96	39	0.7	3823.2	3129.1	80	80	CR	yes	1	3.7	Outside GTV	1	28	Intracranial PD	Yes
5	51	158	48	No	No	No	No	Invasive ductal carcinoma	III	Positive	Negative	Positive	No	40	Yes	No	Yes	No	5	WBI+boost	40.8	32.5	48.96	39	4.9	3772.1	3134.7	90	80	PR	no				1	6.26667	Extracranial PD	No
6	39	168	60	Yes	No	No	No	Invasive ductal carcinoma	II	Negative	Negative	Positive	No	50	No	Yes	No	No	2	WBI+boost	53.04	33.85	63.65	40.63	21.6	4833.4	3449.7	80	80	PR	yes	1	9.1	Inside GTV	1	24.9	Extracranial PD	Yes
7	49	155	60	No	No	No	No	Invasive ductal carcinoma	I	Positive	Positive	Negative	No	5	Yes	Yes	No	Yes	3	WBI+boost	40.8	32.5	48.96	39	20.2	3832.1	3179.8	80	80	PR		1	6.9	Inside GTV	1	7.9	Intracranial PD	Yes
8	44	160	68	No	No	No	No	Invasive ductal carcinoma	II	Negative	Negative	Negative	Yes	40	Yes	Yes	No	Yes	2	WBI+boost	58.5	32.5	70.2	39	7.3			80	80	CR		1	12.7333		1	13.3333	Extracranial PD	Yes
9	46	158	57	No	No	No	No	Invasive ductal carcinoma	II	UnkNown	UnkNown	UnkNown	UnkNown	UnkNown	No	Yes	No	Yes	1	WBI+boost	53.04	33.85	63.65	40.63	5.7	5040.4	3506.5	90	90	CR		1	4.3		1	5.23333	Extracranial PD	No
10	53	160	60	No	No	No	No	Invasive ductal carcinoma	II	Negative	Positive	Negative	No	UnkNown	Yes	No	No	Yes	4	WBI+boost	53.04	33.85	63.65	40.63	2.2	4990.1	3623.6	90	90	Not evaluated		1	4.23333	Inside and outside GTV	1	9.16667	Extracranial PD	No
11	36	166	72	No	No	No	No	Invasive ductal carcinoma	II	Negative	Negative	Negative	Yes	30	No	Yes	No	No	2	WBI+boost	53.04	33.85	63.65	40.63	97.1	4926.4	3549.6	80	80	Not evaluated					1	3.13333	Extracranial PD	No
12	49	158	63	No	No	No	No	Invasive ductal carcinoma	II	Negative	Negative	Positive	No	30	No	No	No	No	2	WBI+boost	53.04	33.85	63.65	40.63	9.4	4950.5	3437.6	80	80	PR	yes	1	12.1667	Outside GTV	1	28.6667	Intracranial PD	Yes
13	68	155	50	No	No	No	No	Invasive ductal carcinoma	II	Negative	Negative	Negative	Yes	40	No	Yes	No	No	1	WBI+boost	53.04	33.85	63.65	40.63	22.6	4912.9	3512.2	90	90	Not evaluated					1	20.3667	Extracranial PD	No
14	45	158	45	No	No	No	No	Invasive ductal carcinoma	III	Positive	Positive	Positive	No	20	No	No	No	Yes	5	WBI+boost	53.04	33.85	63.65	40.63	6.9	4951.1	3488.6	80	80	PR	yes	1	6.43333	Inside and outside GTV	1	9.9	Extracranial PD	No
15	38	160	58	No	No	No	No	Invasive ductal carcinoma	II	Positive	Positive	Positive	No	20	Yes	No	Yes	Yes	9	WBI+boost	53.04	33.85	63.65	40.63	22.8	4918.2	3635.3	80	80	PR	yes	1	3.76667	No	1	9.1	Extracranial PD	No
16	58	164	64	No	No	No	No	Invasive ductal carcinoma	II	Positive	Negative	Positive	No	80	No	Yes	No	No	2	WBI+boost	53.04	33.85	63.65	40.63	15.6	4938.5	3514.8	80	80	PR	yes	1	24.2		0	30.0667		No
17	55	163	53	No	No	No	No	Invasive lobular carcinoma 癌	II	Positive	Negative	Positive	No	15	No	Yes	No	No	4	WBI+boost	53.04	33.85	63.65	40.63	3.1	4976.5	3517.8	90	90	PR	yes	1	21.4333		0	37.9667		No
18	79	152	50	No	No	No	No	Invasive ductal carcinoma	II	Negative	Negative	Positive	No	35	Yes	Yes	No	Yes	7	WBI+boost	53.04	33.85	63.65	40.63	10.1	5037.2	3621.7	80	80	Not evaluated	yes				1	21.3333	Intracranial PD	No
19	51	162	62	No	No	No	No	Invasive ductal carcinoma	II	Negative	Negative	Positive	No	30	Yes	No	No	No	5	WBI+boost	53.04	33.85	63.65	40.63	2.3	5113.4	3516.3	80	80	Not evaluated	no				0	20.7667		No
20	57	174	58	No	No	No	No	Invasive ductal carcinoma	II	Negative	Negative	Positive	No	30	No	Yes	Yes	No	2	WBI+boost	53.04	33.85	63.65	40.63	31.6	4993.3	3519.4	90	90	Not evaluated	yes			Unknow	1	13.4	Extracranial PD	No
21	62	165	50	No	No	No	No	Invasive ductal carcinoma	III	Positive	Positive	Negative	No	60	Yes	Yes	No	No	5	WBI+boost	53.04	33.85	63.65	40.63	2.3	5307.1	3607.1	90	90	PR		1	15.2	No	1	15.4333	Extracranial PD	Yes
22	49	165	58	No	No	No	No	Invasive ductal carcinoma	II	Positive	Positive	Positive	No	50	No	No	Yes	No	1	WBI+boost	53.04	33.85	63.65	40.63	2.2	5087.1	3471.8	80	80	Not evaluated	yes				1	14.5333	Intracranial PD	No
23	63	149	54	No	No	Yes	No	Invasive ductal carcinoma	II	Positive	Positive	Negative	No	30	No	No	No	No	4	WBI+boost	53.04	33.85	63.65	40.63	51.2	5176.1	3645.2	80	80	Not evaluated					0	13.7		Yes
24	51	166	82	No	No	No	No	Invasive ductal carcinoma	II	Positive	Positive	Negative	No	30	Yes	No	Yes	No	2	WBI+boost	53.04	33.85	63.65	40.63	16.1	5035.4	3530.1	80	80	PR		1	8.6		1	10.7667	Extracranial PD	No
25	33	160	50	No	No	No	No	Invasive ductal carcinoma	III	Positive	Positive	Positive	No	80	No	Yes	No	No	5	WBI+boost	53.04	33.85	63.65	40.63	8.8	5137.3	3501.2	80	90	PR	yes	1	4.2	Outside GTV	0	9.3		No
26	57	150	55	No	No	No	No	Invasive ductal carcinoma	II	Positive	Positive	Negative	No	30	Yes	Yes	No	Yes	6	WBI+boost	53.04	33.85	63.65	40.63	1	4946.1	3494.5	90	90	PR		1	5.06667		0	5.13333		No
27	39	163	70	No	No	No	No	Invasive ductal carcinoma	II	Positive	Negative	Positive	No	50	Yes	No	Yes	Yes	3	WBI+boost	54.42	35.75	65.3	42.9	18.3	4914.7	3424.1	90	90	PR	yes	1	7.03333	No	0	7.06667		Yes
